# Supplementary material for: Quality assessment of a training program for undergraduate sonography peer tutors: paving the future way for peer-assisted learning in medical ultrasound education
Source: Frontiers journal article supplement (doi:10.3389/fmed.2025.1492596), 2025-03-03
Supplement: Data_Sheet_9.pdf [file Data_Sheet_9.pdf]

**Supplement 9:** Practical examination results between Semesters 11 and 13

| Item                                                                      | Overall    | Semester 11 | Semester 12 | Semester 13 | p-value |
|---------------------------------------------------------------------------|------------|-------------|-------------|-------------|---------|
| <b>Number of tutors</b>                                                   | 147        | 52          | 35          | 60          |         |
| <b>total score</b><br>(max. 49 points)                                    | 41.9 ± 5.1 | 40.2 ± 5.4  | 42.5 ± 3.8  | 43.1 ± 5.3  | 0.009   |
| <b>Patient guidance, communication and indication</b><br>(max. 10 points) | 9.1 ± 1.5  | 8.5 ± 1.8   | 9.4 ± 0.9   | 9.4 ± 1.2   | 0.004   |
| • Establishing a relationship<br>(max. 2 points)                          | 1.9 ± 0.3  | 1.8 ± 0.5   | 2.0 ± 0.0   | 2.0 ± 0.1   | 0.004   |
| • Patient preparation<br>(max. 2 points)                                  | 1.9 ± 0.4  | 1.9 ± 0.5   | 1.9 ± 0.4   | 1.9 ± 0.3   | 0.5     |
| • Communication<br>(max. 2 points)                                        | 1.9 ± 0.4  | 1.8 ± 0.4   | 2.0 ± 0.2   | 1.9 ± 0.4   | 0.2     |
| • Breathing command (max. 2 points)                                       | 1.8 ± 0.6  | 1.8 ± 0.4   | 1.7 ± 0.6   | 1.7 ± 0.6   | 0.8     |
| • Naming the indication (max. 2 points)                                   | 1.8 ± 0.4  | 1.7 ± 0.5   | 1.8 ± 0.4   | 1.9 ± 0.3   | 0.03    |
| <b>Transducer handling and image optimization</b><br>(max. 8 points)      | 7.3 ± 1.0  | 7.2 ± 1.2   | 7.4 ± 0.7   | 7.5 ± 1.0   | 0.2     |
| • Orientation<br>(max. 2 points)                                          | 1.9 ± 0.4  | 2.0 ± 0.0   | 1.8 ± 0.5   | 1.9 ± 0.4   | 0.03    |
| • Transducer positioning (max. 2 points)                                  | 1.8 ± 0.5  | 1.8 ± 0.4   | 1.8 ± 0.5   | 1.9 ± 0.4   | 0.1     |
| • Transducer handling (max. 2 points)                                     | 1.9 ± 0.4  | 1.9 ± 0.3   | 1.8 ± 0.5   | 1.9 ± 0.4   | 0.5     |
| • Image optimization<br>(max. 2 points)                                   | 1.7 ± 0.5  | 1.8 ± 0.4   | 1.7 ± 0.6   | 1.7 ± 0.6   | 0.9     |
| <b>Examination procedure</b> (max. 8 points)                              | 6.7 ± 1.7  | 6.4 ± 1.8   | 6.7 ± 1.7   | 6.9 ± 1.7   | 0.3     |
| <b>Image explanation</b><br>(max. 4 points)                               | 3.8 ± 0.7  | 3.7 ± 1.0   | 3.8 ± 0.5   | 3.9 ± 0.5   | 0.2     |
| <b>Measurement/advanced examination</b><br>(max. 6 points)                | 5.1 ± 1.5  | 5.1 ± 1.4   | 5.3 ± 1.2   | 4.8 ± 1.6   | 0.3     |



|                                                                                   |           |           |           |           |         |
|-----------------------------------------------------------------------------------|-----------|-----------|-----------|-----------|---------|
| <b>Image documentation</b><br>(max. 1 point)                                      | 0.5 ± 0.5 | 0.2 ± 0.4 | 0.4 ± 0.5 | 0.7 ± 0.5 | <0.001  |
| <b>Pathology assessment + description of further procedure</b><br>(max. 4 points) | 2.8 ± 1.2 | 2.4 ± 0.8 | 2.7 ± 1.3 | 3.2 ± 1.2 | 0.00011 |
| <b>Overall impression</b><br>(max. 8 points)                                      | 6.7 ± 1.0 | 6.7 ± 1.0 | 6.7 ± 0.8 | 6.8 ± 1.2 | 0.4     |
